# Supplementary material
Source: Springer Nature journal article supplement (https://www.springermedizin.de/resource/supplementary/12874_2008_306_MOESM4_ESM.pdf/9434202)

a: Step 5 completed

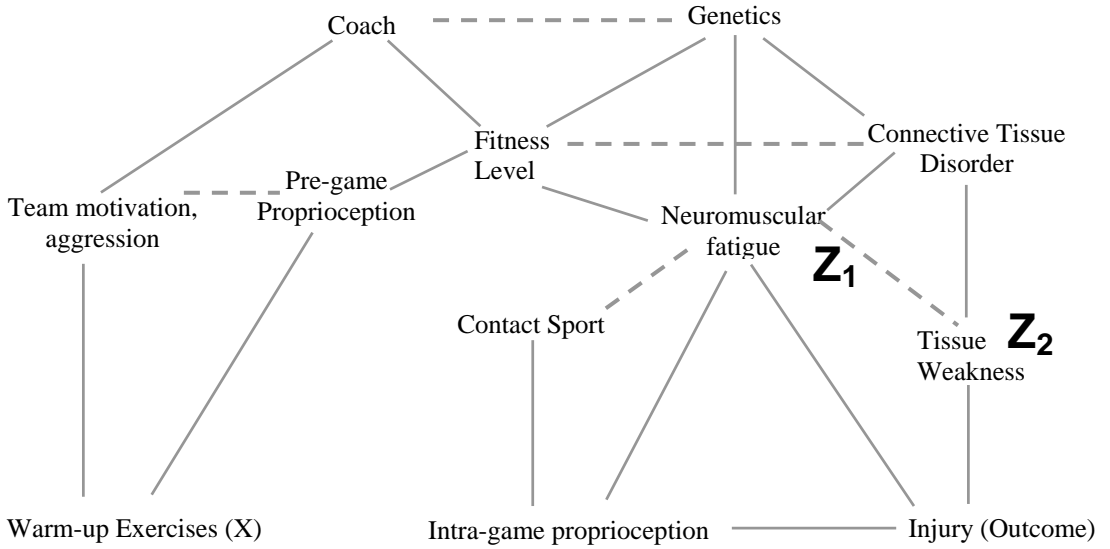

b: Step 6 completed

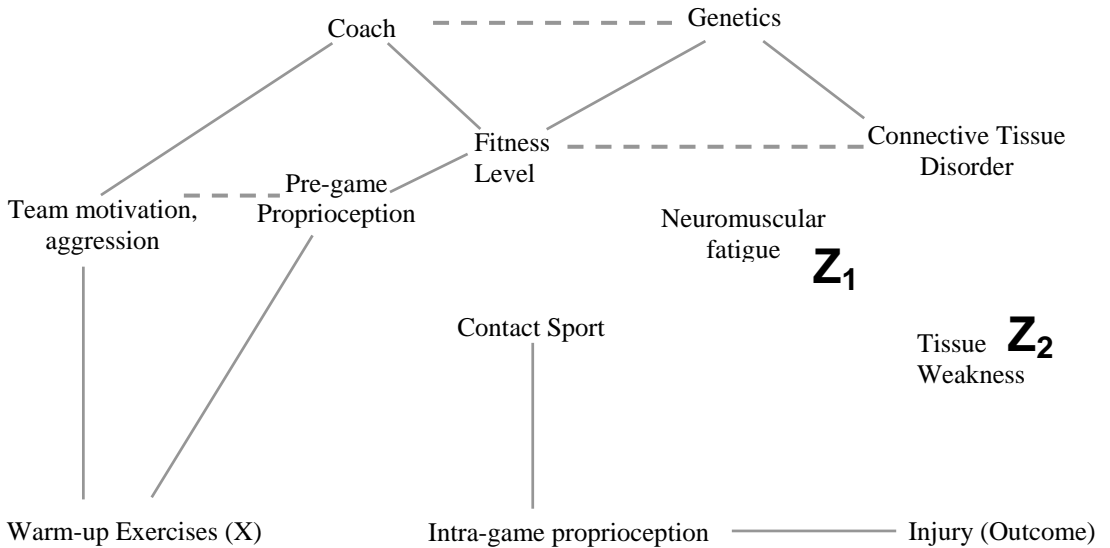

Supplement: MOESM4 [file 9434202]
